# Supplementary material
Source: Springer Nature journal article supplement (https://www.springermedizin.de/resource/supplementary/12943_2010_766_MOESM3_ESM.pdf/9554772)

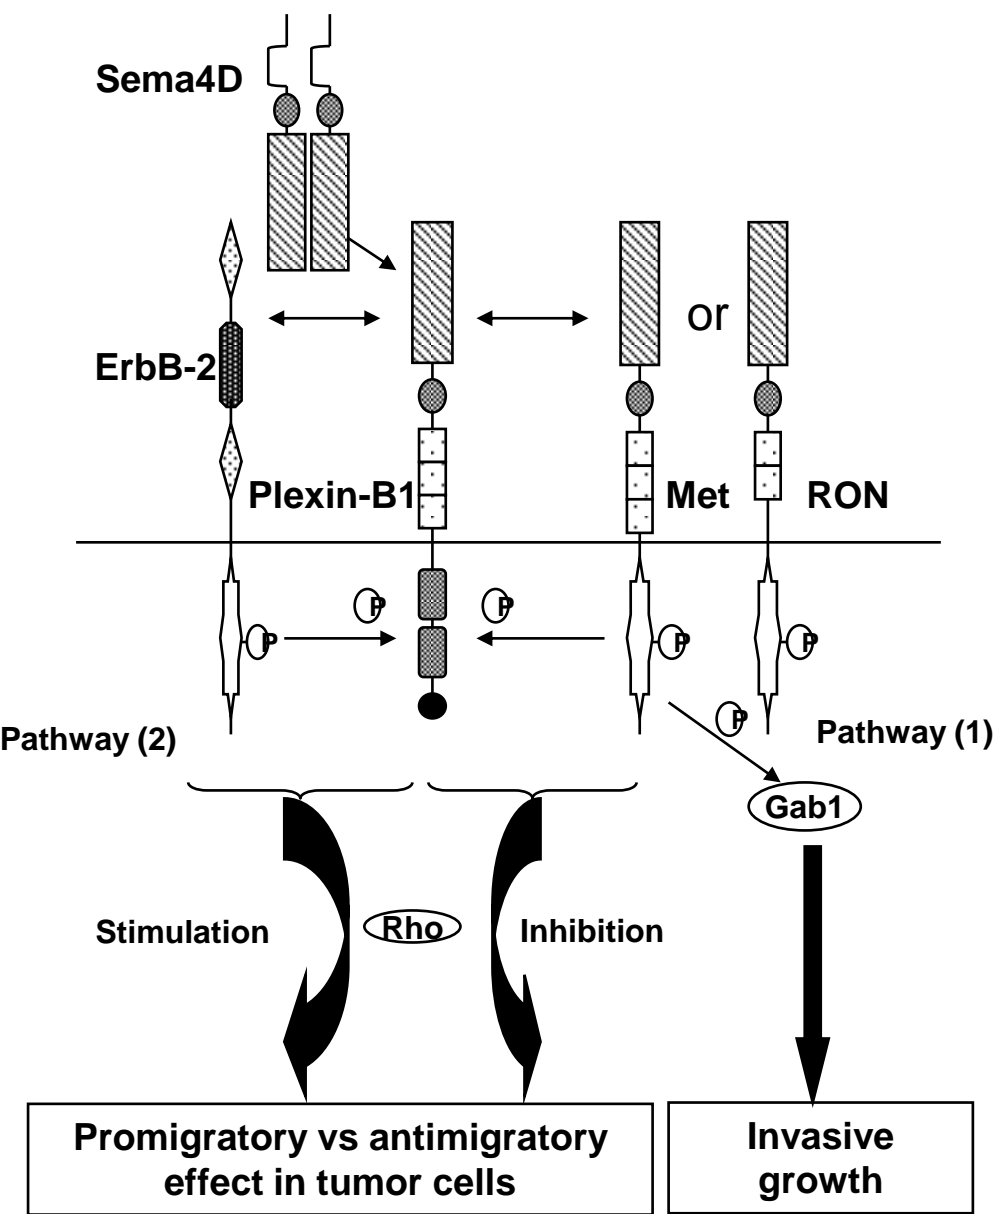

Supplement: MOESM3 [file 9554772]
